# Supplementary material for: The regulatory landscape of a core maize domestication module controlling bud dormancy and growth repression
Source: PubMed Central journal article supplement (PMC6707278; doi:10.1038/s41467-019-11774-w), 2019-08-23
Supplement: 41467_2019_11774_MOESM2_ESM.pdf [file 41467_2019_11774_MOESM2_ESM.pdf]

## **Description of Additional Supplementary Files**

File Name: Supplementary Data 1

Description: Genes expressed in tiller buds across B73 developmental series, gt1 and tb1.

File Name: Supplementary Data 2

Description: Genes expressed in tiller buds across B73 developmental series, gt1 and tb1.

File Name: Supplementary Data 3

Description: Genes differentially expressed in tiller buds across B73 developmental series.

File Name: Supplementary Data 4

Description: Genes differentially expressed in tiller buds between B73 and the two tillering mutants (tb1 and gt1) at 8 and 12 DAP (days after planting).

File Name: Supplementary Data 5

Description: Genes differentially expressed both across B73 developmental series and between B73 and the two tillering mutants (tb1 and gt1).

File Name: Supplementary Data 6

Description: Dynamically expressed genes across B73 developmental series, gt1 and tb1 were grouped by K-Means clustering method in coseq package.

File Name: Supplementary Data 7

Description: Genes differentially expressed between B73 and tb1 at 8 DAP (days after planting).

File Name: Supplementary Data 8

Description: Genes differentially expressed between B73 and tb1 at 12 DAP (days after planting).

File Name: Supplementary Data 9

Description: Genes differentially expressed between B73 and tb1 at both 8 and 12 DAP (days after planting).

File Name: Supplementary Data 10

Description: Genes differentially expressed between B73 and gt1 at 8 DAP (days after planting).

File Name: Supplementary Data 11

Description: Genes differentially expressed between B73 and gt1 at 12 DAP (days after planting).

File Name: Supplementary Data 12

Description: Genes differentially expressed between B73 and gt1 at both 8 and 12 DAP (days after planting).

File Name: Supplementary Data 13

Description: Shared differentially expressed genes between tb1 vs. B73 and gt1 vs. B73 at 8 DAP (days after planting).

File Name: Supplementary Data 14

Description: Shared differentially expressed genes between tb1 vs. B73 and gt1 vs. B73 at 12 DAP (days after planting).

File Name: Supplementary Data 15

Description: Shared differentially expressed genes between tb1 vs. B73 and gt1 vs. B73 at both 8 and 12 DAP (days after planting).

File Name: Supplementary Data 16

Description: TB1 targeted genes by CHIP-seq.

File Name: Supplementary Data 17

Description: Sequence alignment of the TB1 binding region in the tb1, prolificacy locus and tga1 promoter.

File Name: Supplementary Data 18

Description: Genes expressed in tiller buds across B73 developmental series, gt1 and tb1.
