# Supplementary material for: The regulatory landscape of a core maize domestication module controlling bud dormancy and growth repression
Source: PubMed Central journal article supplement (PMC6707278; doi:10.1038/s41467-019-11774-w), 2019-08-23
Supplement: 41467_2019_11774_MOESM19_ESM.pdf [file 41467_2019_11774_MOESM19_ESM.pdf]

A

Zea mays cultivar

Z. mays ssp. parvuligula

Zea mays ssp. mexicana

Tourist

Table with 4 columns: Accession ID, Species, and sequence alignment. Rows include CHI349, PI213793, OAX68, URG II, MEX48, SFGYLOS 264, PUE32, VEN453, GUA131, CHR1160, MAG450, YUC7, AFP33, SAN329, OAX70, GUA14, JSyMAS 401, JSyYLOS 161, Wilkes\_Si166, SFGYLOS 130, JSyYLOS 119, CIMMYT 8783, JSg\_197, JSyYLOS 109, JSg\_378, CIMMYT 11355, SFGYLOS 130, USDA\_P156686, Benz\_967, Beadle\_Kato\_S1, JSg\_374, CIMMYT 11374, Puga\_I066.

Table with 4 columns: Accession ID, Species, and sequence alignment. Rows include CHI349, PI213793, OAX68, URG II, MEX48, SFGYLOS 264, PUE32, VEN453, GUA131, CHR1160, MAG450, YUC7, AFP33, SAN329, OAX70, GUA14, JSyMAS 401, JSyYLOS 161, Wilkes\_Si166, SFGYLOS 130, JSyYLOS 119, CIMMYT 8783, JSg\_197, JSyYLOS 109, JSg\_378, CIMMYT 11355, SFGYLOS 130, USDA\_P156686, Benz\_967, Beadle\_Kato\_S1, JSg\_374, CIMMYT 11374, Puga\_I066.

Table with 4 columns: Accession ID, Species, and sequence alignment. Rows include CHI349, PI213793, OAX68, URG II, MEX48, SFGYLOS 264, PUE32, VEN453, GUA131, CHR1160, MAG450, YUC7, AFP33, SAN329, OAX70, GUA14, JSyMAS 401, Wilkes\_Si166, SFGYLOS 119, CIMMYT 8783, JSg\_197, JSyYLOS 109, JSg\_378, CIMMYT 11355, SFGYLOS 130, USDA\_P156686, Benz\_967, Beadle\_Kato\_S1, JSg\_374, CIMMYT 11374, Puga\_I066.

Table with 4 columns: Accession ID, Species, and sequence alignment. Rows include CHI349, PI213793, OAX68, URG II, MEX48, SFGYLOS 264, PUE32, VEN453, GUA131, CHR1160, MAG450, YUC7, AFP33, SAN329, OAX70, GUA14, JSyMAS 401, JSyYLOS 161, Wilkes\_Si166, SFGYLOS 119, CIMMYT 8783, JSg\_197, JSyYLOS 109, JSg\_378, CIMMYT 11355, SFGYLOS 130, USDA\_P156686, Benz\_967, Beadle\_Kato\_S1, JSg\_374, CIMMYT 11374, Puga\_I066.

Table with 4 columns: Accession ID, Gene Name, Coordinates, and Sequence. Rows include CHI349, P1213793, OAX68, URG II, MEX38, S1E0E 130, PUE32, VEN453, GUA131, CHH160, MAG450, YUC7, RFL33, SAN329, OAX70, GUA14, JSyMYMAS 401, JSyMYLOS 161, Wilkes\_Site6, JSyMYLOS 130, CIMMYT 8783, JSG 197, JSyMYLOS 109, JSG 378, CIMMYT 11355, JSG 374, USA 1566686, Benz 967, Beadle\_Kato\_S1, JSG 374, CIMMYT 11374, Puga 11066, Puga 11066.

Table with 4 columns: Accession ID, Gene Name, Coordinates, and Sequence. Rows include CHI349, P1213793, OAX68, URG II, MEX38, S1E0E 264, PUE32, VEN453, GUA131, CHH160, MAG450, YUC7, RFL33, SAN329, OAX70, GUA14, JSyMYMAS 401, JSyMYLOS 161, Wilkes\_Site6, JSyMYLOS 130, CIMMYT 8783, JSG 197, JSyMYLOS 109, JSG 378, CIMMYT 11355, JSG 374, USA 1566686, Benz 967, Beadle\_Kato\_S1, JSG 374, CIMMYT 11374, Puga 11066, Puga 11066.

Table with 4 columns: Accession ID, Gene Name, Coordinates, and Sequence. Rows include CHI349, P1213793, OAX68, URG II, MEX38, S1E0E 264, PUE32, VEN453, GUA131, CHH160, MAG450, YUC7, RFL33, SAN329, OAX70, GUA14, JSyMYMAS 401, JSyMYLOS 161, Wilkes\_Site6, JSyMYLOS 130, CIMMYT 8783, JSG 197, JSyMYLOS 109, JSG 378, CIMMYT 11355, JSG 374, USA 1566686, Benz 967, Beadle\_Kato\_S1, JSG 374, CIMMYT 11374, Puga 11066, Puga 11066.

Table with 4 columns: Accession ID, Gene Name, Coordinates, and Sequence. Rows include CHI349, P1213793, OAX68, URG II, MEX38, S1E0E 130, PUE32, VEN453, GUA131, CHH160, MAG450, YUC7, RFL33, SAN329, OAX70, GUA14, JSyMYMAS 401, JSyMYLOS 161, Wilkes\_Site6, JSyMYLOS 130, CIMMYT 8783, JSG 197, JSyMYLOS 109, JSG 378, CIMMYT 11355, JSG 374, USA 1566686, Benz 967, Beadle\_Kato\_S1, JSG 374, CIMMYT 11374, Puga 11066, Puga 11066.





|                | Z. mays ssp. parviglumis | Z. mays ssp. mexicana | Hopsotch |
|----------------|--------------------------|-----------------------|----------|
| CHI349         | 1702                     | 1702                  | 1702     |
| PI213793       | 1700                     | 1700                  | 1700     |
| OAX68          | 1704                     | 1704                  | 1704     |
| JSG_II         | 1663                     | 1663                  | 1663     |
| MEX48          | 1701                     | 1701                  | 1701     |
| SIN2           | 1686                     | 1686                  | 1686     |
| PUE32          | 1694                     | 1694                  | 1694     |
| VEN453         | 1701                     | 1701                  | 1701     |
| GUA131         | 1701                     | 1701                  | 1701     |
| CHI650         | 1699                     | 1699                  | 1699     |
| MAG450         | 1703                     | 1703                  | 1703     |
| YUC7           | 1704                     | 1704                  | 1704     |
| APC13          | 1703                     | 1703                  | 1703     |
| SAN329         | 1702                     | 1702                  | 1702     |
| OAX70          | 1704                     | 1704                  | 1704     |
| GUA14          | 1242                     | 1242                  | 1242     |
| JSGYMAS_401    | 1700                     | 1700                  | 1700     |
| JSGYLOS_161    | 1699                     | 1699                  | 1699     |
| Wilkes_Site6   | 1701                     | 1701                  | 1701     |
| JSGYLOS_130    | 821                      | 821                   | 821      |
| JSGYLOS_119    | 821                      | 821                   | 821      |
| CIMMYT_8783    | 842                      | 842                   | 842      |
| JSG_197        | 849                      | 849                   | 849      |
| JSGYLOS_109    | 843                      | 843                   | 843      |
| JSG_378        | 846                      | 846                   | 846      |
| CIMMYT_11355   | 838                      | 838                   | 838      |
| JSGYMAS_264    | 836                      | 836                   | 836      |
| USDA_P156686   | 830                      | 830                   | 830      |
| Benz_967       | 929                      | 929                   | 929      |
| Beadle_Kato_S1 | 859                      | 859                   | 859      |
| JSG_374        | 866                      | 866                   | 866      |
| CIMMYT_11374   | 862                      | 862                   | 862      |
| Puga_11066     | 839                      | 839                   | 839      |
| Puga_11066     | 1                        | 1                     | 1        |
| CHI349         | 1812                     | 1812                  | 1812     |
| PI213793       | 1810                     | 1810                  | 1810     |
| OAX68          | 1814                     | 1814                  | 1814     |
| JSG_II         | 1773                     | 1773                  | 1773     |
| MEX48          | 1796                     | 1796                  | 1796     |
| SIN2           | 1795                     | 1795                  | 1795     |
| PUE32          | 1804                     | 1804                  | 1804     |
| VEN453         | 1818                     | 1818                  | 1818     |
| GUA131         | 1811                     | 1811                  | 1811     |
| CHI650         | 1809                     | 1809                  | 1809     |
| MAG450         | 1813                     | 1813                  | 1813     |
| YUC7           | 1814                     | 1814                  | 1814     |
| APC13          | 1813                     | 1813                  | 1813     |
| SAN329         | 1812                     | 1812                  | 1812     |
| OAX70          | 1814                     | 1814                  | 1814     |
| GUA14          | 1242                     | 1242                  | 1242     |
| JSGYMAS_401    | 1810                     | 1810                  | 1810     |
| JSGYLOS_161    | 1809                     | 1809                  | 1809     |
| Wilkes_Site6   | 1810                     | 1810                  | 1810     |
| S16            | 832                      | 832                   | 832      |
| JSGYLOS_119    | 821                      | 821                   | 821      |
| CIMMYT_8783    | 842                      | 842                   | 842      |
| JSG_197        | 849                      | 849                   | 849      |
| JSGYLOS_109    | 843                      | 843                   | 843      |
| JSG_378        | 846                      | 846                   | 846      |
| CIMMYT_11355   | 838                      | 838                   | 838      |
| JSGYMAS_264    | 836                      | 836                   | 836      |
| USDA_P156686   | 830                      | 830                   | 830      |
| Benz_967       | 960                      | 960                   | 960      |
| Beadle_Kato_S1 | 859                      | 859                   | 859      |
| JSG_374        | 866                      | 866                   | 866      |
| CIMMYT_11374   | 862                      | 862                   | 862      |
| Puga_11066     | 839                      | 839                   | 839      |
| Puga_11066     | 111                      | 111                   | 111      |
| CHI349         | 1922                     | 1922                  | 1922     |
| PI213793       | 1920                     | 1920                  | 1920     |
| OAX68          | 1924                     | 1924                  | 1924     |
| JSG_II         | 1883                     | 1883                  | 1883     |
| MEX48          | 1921                     | 1921                  | 1921     |
| SIN2           | 1912                     | 1912                  | 1912     |
| PUE32          | 1914                     | 1914                  | 1914     |
| VEN453         | 1928                     | 1928                  | 1928     |
| GUA131         | 1921                     | 1921                  | 1921     |
| CHI650         | 1919                     | 1919                  | 1919     |
| MAG450         | 1923                     | 1923                  | 1923     |
| YUC7           | 1924                     | 1924                  | 1924     |
| APC13          | 1923                     | 1923                  | 1923     |
| SAN329         | 1922                     | 1922                  | 1922     |
| OAX70          | 1924                     | 1924                  | 1924     |
| GUA14          | 1242                     | 1242                  | 1242     |
| JSGYMAS_401    | 1920                     | 1920                  | 1920     |
| JSGYLOS_161    | 1919                     | 1919                  | 1919     |
| Wilkes_Site6   | 1920                     | 1920                  | 1920     |
| JSGYLOS_130    | 852                      | 852                   | 852      |
| JSGYLOS_119    | 842                      | 842                   | 842      |
| CIMMYT_8783    | 849                      | 849                   | 849      |
| JSG_197        | 842                      | 842                   | 842      |
| JSGYLOS_109    | 843                      | 843                   | 843      |
| JSG_378        | 846                      | 846                   | 846      |
| CIMMYT_11355   | 858                      | 858                   | 858      |
| JSGYMAS_264    | 836                      | 836                   | 836      |
| USDA_P156686   | 830                      | 830                   | 830      |
| Benz_967       | 975                      | 975                   | 975      |
| Beadle_Kato_S1 | 859                      | 859                   | 859      |
| JSG_374        | 866                      | 866                   | 866      |
| CIMMYT_11374   | 862                      | 862                   | 862      |
| Puga_11066     | 839                      | 839                   | 839      |
| Puga_11066     | 146                      | 146                   | 146      |
| CHI349         | 2031                     | 2031                  | 2031     |
| PI213793       | 2030                     | 2030                  | 2030     |
| OAX68          | 2034                     | 2034                  | 2034     |
| JSG_II         | 1993                     | 1993                  | 1993     |
| MEX48          | 2031                     | 2031                  | 2031     |
| SIN2           | 2016                     | 2016                  | 2016     |
| PUE32          | 2018                     | 2018                  | 2018     |
| VEN453         | 2038                     | 2038                  | 2038     |
| GUA131         | 2031                     | 2031                  | 2031     |
| CHI650         | 2029                     | 2029                  | 2029     |
| MAG450         | 2033                     | 2033                  | 2033     |
| YUC7           | 2034                     | 2034                  | 2034     |
| APC13          | 2033                     | 2033                  | 2033     |
| SAN329         | 2032                     | 2032                  | 2032     |
| OAX70          | 2034                     | 2034                  | 2034     |
| GUA14          | 1242                     | 1242                  | 1242     |
| JSGYMAS_401    | 2030                     | 2030                  | 2030     |
| JSGYLOS_161    | 2029                     | 2029                  | 2029     |
| Wilkes_Site6   | 2030                     | 2030                  | 2030     |
| JSGYLOS_130    | 821                      | 821                   | 821      |
| JSGYLOS_119    | 821                      | 821                   | 821      |
| CIMMYT_8783    | 842                      | 842                   | 842      |
| JSG_197        | 849                      | 849                   | 849      |
| JSGYLOS_109    | 843                      | 843                   | 843      |
| JSG_378        | 846                      | 846                   | 846      |
| CIMMYT_11355   | 858                      | 858                   | 858      |
| JSGYMAS_264    | 836                      | 836                   | 836      |
| USDA_P156686   | 830                      | 830                   | 830      |
| Benz_967       | 1010                     | 1010                  | 1010     |
| Beadle_Kato_S1 | 859                      | 859                   | 859      |
| JSG_374        | 866                      | 866                   | 866      |
| CIMMYT_11374   | 862                      | 862                   | 862      |
| Puga_11066     | 839                      | 839                   | 839      |
| Puga_11066     | 146                      | 146                   | 146      |

|               | <i>Zea mays ssp. parvuligumis</i> | <i>Zea mays ssp. mexicana</i> | Hopsaloch |
|---------------|-----------------------------------|-------------------------------|-----------|
| CHI349        | 2141                              | 2141                          | 2141      |
| P1213793      | 2140                              | 2140                          | 2140      |
| OA68          | 2144                              | 2144                          | 2144      |
| JRG_II        | 2103                              | 2103                          | 2103      |
| ME48          | 2141                              | 2141                          | 2141      |
| SIN2          | 2142                              | 2142                          | 2142      |
| PUE32         | 2141                              | 2141                          | 2141      |
| VEN453        | 2148                              | 2148                          | 2148      |
| GUA131        | 2141                              | 2141                          | 2141      |
| CH160         | 2139                              | 2139                          | 2139      |
| MAG450        | 2143                              | 2143                          | 2143      |
| YUC7          | 2144                              | 2144                          | 2144      |
| AP13          | 2142                              | 2142                          | 2142      |
| SAN329        | 2142                              | 2142                          | 2142      |
| OA70          | 2144                              | 2144                          | 2144      |
| GUA14         | 1242                              | 1242                          | 1242      |
| JSGYMAS_401   | 2140                              | 2140                          | 2140      |
| JSGYLOS_161   | 2139                              | 2139                          | 2139      |
| Wilkes_516e   | 2140                              | 2140                          | 2140      |
| JSGYLOS_130   | 852                               | 852                           | 852       |
| JSGYLOS_119   | 812                               | 812                           | 812       |
| CIMMYT_8783   | 842                               | 842                           | 842       |
| JSG_197       | 849                               | 849                           | 849       |
| JSGYLOS_109   | 843                               | 843                           | 843       |
| JSG_378       | 658                               | 658                           | 658       |
| CIMMYT_11355  | 858                               | 858                           | 858       |
| JSGYMAS_264   | 836                               | 836                           | 836       |
| USDA_P156686  | 810                               | 810                           | 810       |
| Beiz_967      | 1029                              | 1029                          | 1029      |
| Beadle_Ko1_S1 | 859                               | 859                           | 859       |
| JSG_374       | 866                               | 866                           | 866       |
| CIMMYT_11374  | 862                               | 862                           | 862       |
| Puga_11066    | 839                               | 839                           | 839       |
| Puga_11066    | 1                                 | 1                             | 1         |
| CHI349        | 2251                              | 2251                          | 2251      |
| P1213793      | 2250                              | 2250                          | 2250      |
| OA68          | 2254                              | 2254                          | 2254      |
| JRG_II        | 2213                              | 2213                          | 2213      |
| ME48          | 2251                              | 2251                          | 2251      |
| SIN2          | 2236                              | 2236                          | 2236      |
| PUE32         | 2214                              | 2214                          | 2214      |
| VEN453        | 2258                              | 2258                          | 2258      |
| GUA131        | 2251                              | 2251                          | 2251      |
| CH160         | 2249                              | 2249                          | 2249      |
| MAG450        | 2253                              | 2253                          | 2253      |
| YUC7          | 2254                              | 2254                          | 2254      |
| AP13          | 2253                              | 2253                          | 2253      |
| SAN329        | 2214                              | 2214                          | 2214      |
| OA70          | 2254                              | 2254                          | 2254      |
| GUA14         | 1242                              | 1242                          | 1242      |
| JSGYMAS_401   | 2250                              | 2250                          | 2250      |
| JSGYLOS_161   | 2249                              | 2249                          | 2249      |
| Wilkes_516e   | 2250                              | 2250                          | 2250      |
| JSGYLOS_130   | 852                               | 852                           | 852       |
| JSGYLOS_119   | 812                               | 812                           | 812       |
| CIMMYT_8783   | 842                               | 842                           | 842       |
| JSG_197       | 849                               | 849                           | 849       |
| JSGYLOS_109   | 843                               | 843                           | 843       |
| JSG_378       | 740                               | 740                           | 740       |
| CIMMYT_11355  | 858                               | 858                           | 858       |
| JSGYMAS_264   | 836                               | 836                           | 836       |
| USDA_P156686  | 810                               | 810                           | 810       |
| Beiz_967      | 1115                              | 1115                          | 1115      |
| Beadle_Ko1_S1 | 859                               | 859                           | 859       |
| JSG_374       | 866                               | 866                           | 866       |
| CIMMYT_11374  | 862                               | 862                           | 862       |
| Puga_11066    | 839                               | 839                           | 839       |
| Puga_11066    | 111                               | 111                           | 111       |
| CHI349        | 2361                              | 2361                          | 2361      |
| P1213793      | 2360                              | 2360                          | 2360      |
| OA68          | 2364                              | 2364                          | 2364      |
| JRG_II        | 2323                              | 2323                          | 2323      |
| ME48          | 2361                              | 2361                          | 2361      |
| SIN2          | 2346                              | 2346                          | 2346      |
| PUE32         | 2314                              | 2314                          | 2314      |
| VEN453        | 2368                              | 2368                          | 2368      |
| GUA131        | 2361                              | 2361                          | 2361      |
| CH160         | 2359                              | 2359                          | 2359      |
| MAG450        | 2363                              | 2363                          | 2363      |
| YUC7          | 2364                              | 2364                          | 2364      |
| AP13          | 2363                              | 2363                          | 2363      |
| SAN329        | 2314                              | 2314                          | 2314      |
| OA70          | 2364                              | 2364                          | 2364      |
| GUA14         | 1242                              | 1242                          | 1242      |
| JSGYMAS_401   | 2360                              | 2360                          | 2360      |
| JSGYLOS_161   | 2359                              | 2359                          | 2359      |
| Wilkes_516e   | 2360                              | 2360                          | 2360      |
| JSGYLOS_130   | 852                               | 852                           | 852       |
| JSGYLOS_119   | 812                               | 812                           | 812       |
| CIMMYT_8783   | 842                               | 842                           | 842       |
| JSG_197       | 849                               | 849                           | 849       |
| JSGYLOS_109   | 843                               | 843                           | 843       |
| JSG_378       | 747                               | 747                           | 747       |
| CIMMYT_11355  | 858                               | 858                           | 858       |
| JSGYMAS_264   | 836                               | 836                           | 836       |
| USDA_P156686  | 810                               | 810                           | 810       |
| Beiz_967      | 1122                              | 1122                          | 1122      |
| Beadle_Ko1_S1 | 859                               | 859                           | 859       |
| JSG_374       | 866                               | 866                           | 866       |
| CIMMYT_11374  | 862                               | 862                           | 862       |
| Puga_11066    | 839                               | 839                           | 839       |
| Puga_11066    | 149                               | 149                           | 149       |
| CHI349        | 2471                              | 2471                          | 2471      |
| P1213793      | 2470                              | 2470                          | 2470      |
| OA68          | 2474                              | 2474                          | 2474      |
| JRG_II        | 2433                              | 2433                          | 2433      |
| ME48          | 2471                              | 2471                          | 2471      |
| SIN2          | 2456                              | 2456                          | 2456      |
| PUE32         | 2471                              | 2471                          | 2471      |
| VEN453        | 2478                              | 2478                          | 2478      |
| GUA131        | 2471                              | 2471                          | 2471      |
| CH160         | 2469                              | 2469                          | 2469      |
| MAG450        | 2473                              | 2473                          | 2473      |
| YUC7          | 2474                              | 2474                          | 2474      |
| AP13          | 2473                              | 2473                          | 2473      |
| SAN329        | 2472                              | 2472                          | 2472      |
| OA70          | 2472                              | 2472                          | 2472      |
| GUA14         | 1242                              | 1242                          | 1242      |
| JSGYMAS_401   | 2470                              | 2470                          | 2470      |
| JSGYLOS_161   | 2469                              | 2469                          | 2469      |
| Wilkes_516e   | 2470                              | 2470                          | 2470      |
| JSGYLOS_130   | 852                               | 852                           | 852       |
| JSGYLOS_119   | 812                               | 812                           | 812       |
| CIMMYT_8783   | 842                               | 842                           | 842       |
| JSG_197       | 849                               | 849                           | 849       |
| JSGYLOS_109   | 843                               | 843                           | 843       |
| JSG_378       | 765                               | 765                           | 765       |
| CIMMYT_11355  | 858                               | 858                           | 858       |
| JSGYMAS_264   | 836                               | 836                           | 836       |
| USDA_P156686  | 810                               | 810                           | 810       |
| Beiz_967      | 1140                              | 1140                          | 1140      |
| Beadle_Ko1_S1 | 859                               | 859                           | 859       |
| JSG_374       | 866                               | 866                           | 866       |
| CIMMYT_11374  | 862                               | 862                           | 862       |
| Puga_11066    | 839                               | 839                           | 839       |
| Puga_11066    | 149                               | 149                           | 149       |

Table with 3 columns: Accession ID (e.g., CH1349, P1213793, OAX68), Species (Z. mays ssp. parviglumis, Z. mays ssp. mexicana, Hopscotch), and Sequence (DNA bases). Includes a blue bar at the bottom of the sequence block.

Table with 3 columns: Accession ID, Species, and Sequence. Similar to the first table, but with a blue bar highlighting a specific region in the sequence.

Table with 3 columns: Accession ID, Species, and Sequence. Similar to the first table, but with a blue bar highlighting a specific region in the sequence.

Table with 3 columns: Accession ID, Species, and Sequence. Similar to the first table, but with a blue bar highlighting a specific region in the sequence.

Table with 4 columns: Accession ID, coordinates, sequence, and reference sequence. Rows include CHI349, P1213793, OAX68, USG\_II, MEX48, SIN2, PUE32, VEN453, GUA131, CHI160, MAG450, YUC7, APC13, SAN329, OAX70, GUA14, JSGYMAS\_401, USGyLOS\_161, Wilkes\_Site6, USGyLOS\_130, USGyLOS\_119, CIMMYT\_8783, JSG\_197, USGyLOS\_109, USG\_378, APC13\_11355, USMA\_P56686, Benz\_967, Beadle\_Kato\_S1, USG\_374, CIMMYT\_11374, Puga\_11066, Puga\_11060.

Table with 4 columns: Accession ID, coordinates, sequence, and reference sequence. Rows include CHI349, P1213793, OAX68, USG\_II, MEX48, SIN2, PUE32, VEN453, GUA131, CHI160, MAG450, YUC7, APC13, SAN329, OAX70, GUA14, JSGYMAS\_401, USGyLOS\_161, Wilkes\_Site6, USGyLOS\_130, USGyLOS\_119, CIMMYT\_8783, JSG\_197, USGyLOS\_109, USG\_378, CIMMYT\_11355, AP13\_264, USMA\_P56686, Benz\_967, Beadle\_Kato\_S1, USG\_374, CIMMYT\_11374, Puga\_11066, Puga\_11060.

Table with 4 columns: Accession ID, coordinates, sequence, and reference sequence. Rows include CHI349, P1213793, OAX68, USG\_II, MEX48, SIN2, PUE32, VEN453, GUA131, CHI160, MAG450, YUC7, APC13, SAN329, OAX70, GUA14, JSGYMAS\_401, USGyLOS\_161, Wilkes\_Site6, USGyLOS\_130, USGyLOS\_119, CIMMYT\_8783, JSG\_197, USGyLOS\_109, USG\_378, CIMMYT\_11355, USMA\_P5686, Benz\_967, Beadle\_Kato\_S1, USG\_374, CIMMYT\_11374, Puga\_11066, Puga\_11060.

Table with 4 columns: Accession ID, coordinates, sequence, and reference sequence. Rows include CHI349, P1213793, OAX68, USG\_II, MEX48, SIN2, PUE32, VEN453, GUA131, CHI160, MAG450, YUC7, APC13, SAN329, OAX70, GUA14, JSGYMAS\_401, USGyLOS\_161, Wilkes\_Site6, USGyLOS\_130, USGyLOS\_119, CIMMYT\_8783, JSG\_197, USGyLOS\_109, USG\_378, CIMMYT\_11355, USMA\_P56686, Benz\_967, Beadle\_Kato\_S1, USG\_374, CIMMYT\_11374, Puga\_11066, Puga\_11060.

|                | Z. mays ssp. parvulmuis | Z. mays ssp. mexicana      | TB1 binding                |
|----------------|-------------------------|----------------------------|----------------------------|
| CHI349         | 3377                    | CGAGAGCTCATGCACACAGGGGG    | CGAGAGCTCATGCACACAGGGGG    |
| P1213793       | 3378                    | CGAGAGCTCATGCACACAGGGGG    | CGAGAGCTCATGCACACAGGGGG    |
| OAX68          | 3388                    | CGAGAGCTCATGCACACAGGGGG    | CGAGAGCTCATGCACACAGGGGG    |
| URG_II         | 3339                    | CGAGAGCTCATGCACACAGGGGG    | CGAGAGCTCATGCACACAGGGGG    |
| MEX48          | 3383                    | CGAGAGCTCATGCACACAGGGGG    | CGAGAGCTCATGCACACAGGGGG    |
| SIN2           | 3352                    | CGAGAGCTCATGCACACAGGGGG    | CGAGAGCTCATGCACACAGGGGG    |
| PUE32          | 3382                    | CGAGAGCTCATGCACACAGGGGG    | CGAGAGCTCATGCACACAGGGGG    |
| VEN453         | 3382                    | CGAGAGCTCATGCACACAGGGGG    | CGAGAGCTCATGCACACAGGGGG    |
| GUA131         | 3377                    | CGAGAGCTCATGCACACAGGGGG    | CGAGAGCTCATGCACACAGGGGG    |
| CHI160         | 3381                    | CGAGAGCTCATGCACACAGGGGG    | CGAGAGCTCATGCACACAGGGGG    |
| MA0450         | 3381                    | CGAGAGCTCATGCACACAGGGGG    | CGAGAGCTCATGCACACAGGGGG    |
| YUC7           | 3380                    | CGAGAGCTCATGCACACAGGGGG    | CGAGAGCTCATGCACACAGGGGG    |
| APC13          | 3379                    | CGAGAGCTCATGCACACAGGGGG    | CGAGAGCTCATGCACACAGGGGG    |
| GAW329         | 3378                    | CGAGAGCTCATGCACACAGGGGG    | CGAGAGCTCATGCACACAGGGGG    |
| OAX70          | 3386                    | CGAGAGCTCATGCACACAGGGGG    | CGAGAGCTCATGCACACAGGGGG    |
| GUA14          | 1829                    | CGAGAGCTCATGCACACAGGGGG    | CGAGAGCTCATGCACACAGGGGG    |
| JSyMAS_401     | 3380                    | CGAGAGCTCATGCACACAGGGGG    | CGAGAGCTCATGCACACAGGGGG    |
| JSyLOS_161     | 3378                    | CGAGAGCTCATGCACACAGGGGG    | CGAGAGCTCATGCACACAGGGGG    |
| Wilkes_Site6   | 3380                    | CGAGAGCTCATGCACACAGGGGG    | CGAGAGCTCATGCACACAGGGGG    |
| JSyLOS_130     | 1443                    | CGAGAGCTCATGCACACAGGGGG    | CGAGAGCTCATGCACACAGGGGG    |
| USDA_P1566686  | 1433                    | CGAGAGCTCATGCACACAGGGGG    | CGAGAGCTCATGCACACAGGGGG    |
| CINMYT_8783    | 1415                    | CGAGAGCTCATGCACACAGGGGG    | CGAGAGCTCATGCACACAGGGGG    |
| JSyG_197       | 1463                    | CGAGAGCTCATGCACACAGGGGG    | CGAGAGCTCATGCACACAGGGGG    |
| JSyLOS_109     | 1442                    | CGAGAGCTCATGCACACAGGGGG    | CGAGAGCTCATGCACACAGGGGG    |
| JSyG_378       | 1423                    | CGAGAGCTCATGCACACAGGGGG    | CGAGAGCTCATGCACACAGGGGG    |
| CINMYT_11355   | 1461                    | CGAGAGCTCATGCACACAGGGGG    | CGAGAGCTCATGCACACAGGGGG    |
| JSyMAS_264     | 1436                    | CGAGAGCTCATGCACACAGGGGG    | CGAGAGCTCATGCACACAGGGGG    |
| USDA_P1566686  | 1433                    | CGAGAGCTCATGCACACAGGGGG    | CGAGAGCTCATGCACACAGGGGG    |
| BeadLe_Kato_S1 | 1750                    | CGAGAGCTCATGCACACAGGGGG    | CGAGAGCTCATGCACACAGGGGG    |
| JSyG_374       | 1467                    | CGAGAGCTCATGCACACAGGGGG    | CGAGAGCTCATGCACACAGGGGG    |
| CINMYT_11374   | 1441                    | CGAGAGCTCATGCACACAGGGGG    | CGAGAGCTCATGCACACAGGGGG    |
| Puga_11066     | 1451                    | CGAGAGCTCATGCACACAGGGGG    | CGAGAGCTCATGCACACAGGGGG    |
| Puga_11066     | 1                       | CGGGGTCACAGGGTACACACAGGGGG | CGGGGTCACAGGGTACACACAGGGGG |
| CHI349         | 3104                    | TGGCC                      | ATGGATCAGCGCGTGGCC         |
| P1213793       | 3105                    | TGGCC                      | ATGGATCAGCGCGTGGCC         |
| OAX68          | 3115                    | TGGCC                      | ATGGATCAGCGCGTGGCC         |
| URG_II         | 3068                    | TGGCC                      | ATGGATCAGCGCGTGGCC         |
| MEX48          | 3110                    | TGGCC                      | ATGGATCAGCGCGTGGCC         |
| SIN2           | 3083                    | TGGCC                      | ATGGATCAGCGCGTGGCC         |
| PUE32          | 3106                    | TGGCC                      | ATGGATCAGCGCGTGGCC         |
| VEN453         | 3111                    | TGGCC                      | ATGGATCAGCGCGTGGCC         |
| GUA131         | 3106                    | TGGCC                      | ATGGATCAGCGCGTGGCC         |
| CHI160         | 3108                    | TGGCC                      | ATGGATCAGCGCGTGGCC         |
| MA0450         | 3108                    | TGGCC                      | ATGGATCAGCGCGTGGCC         |
| YUC7           | 3107                    | TGGCC                      | ATGGATCAGCGCGTGGCC         |
| APC13          | 3106                    | TGGCC                      | ATGGATCAGCGCGTGGCC         |
| GAW329         | 3109                    | TGGCC                      | ATGGATCAGCGCGTGGCC         |
| OAX70          | 3113                    | TGGCC                      | ATGGATCAGCGCGTGGCC         |
| GUA14          | 1576                    | TGGCC                      | ATGGATCAGCGCGTGGCC         |
| JSyMAS_401     | 3109                    | TGGCC                      | ATGGATCAGCGCGTGGCC         |
| JSyLOS_161     | 3107                    | TGGCC                      | ATGGATCAGCGCGTGGCC         |
| Wilkes_Site6   | 3109                    | TGGCC                      | ATGGATCAGCGCGTGGCC         |
| JSyLOS_130     | 1179                    | TGGCC                      | ATGGATCAGCGCGTGGCC         |
| USDA_P1566686  | 1179                    | TGGCC                      | ATGGATCAGCGCGTGGCC         |
| CINMYT_8783    | 1176                    | TGGCC                      | ATGGATCAGCGCGTGGCC         |
| JSyG_197       | 1183                    | TGGCC                      | ATGGATCAGCGCGTGGCC         |
| JSyLOS_109     | 1166                    | TGGCC                      | ATGGATCAGCGCGTGGCC         |
| JSyG_378       | 1143                    | TGGCC                      | ATGGATCAGCGCGTGGCC         |
| CINMYT_11355   | 1195                    | TGGCC                      | ATGGATCAGCGCGTGGCC         |
| JSyMAS_264     | 1174                    | TGGCC                      | ATGGATCAGCGCGTGGCC         |
| USDA_P1566686  | 1179                    | TGGCC                      | ATGGATCAGCGCGTGGCC         |
| BeadLe_Kato_S1 | 1535                    | TGGCC                      | ATGGATCAGCGCGTGGCC         |
| JSyG_374       | 1201                    | TGGCC                      | ATGGATCAGCGCGTGGCC         |
| CINMYT_11374   | 1194                    | TGGCC                      | ATGGATCAGCGCGTGGCC         |
| Puga_11066     | 1180                    | TGGCC                      | ATGGATCAGCGCGTGGCC         |
| Puga_11066     | 111                     | TGGCC                      | ATGGATCAGCGCGTGGCC         |
| CHI349         | 3174                    | TGGCC                      | ATGGATCAGCGCGTGGCC         |
| P1213793       | 3175                    | TGGCC                      | ATGGATCAGCGCGTGGCC         |
| OAX68          | 3185                    | TGGCC                      | ATGGATCAGCGCGTGGCC         |
| URG_II         | 3138                    | TGGCC                      | ATGGATCAGCGCGTGGCC         |
| MEX48          | 3180                    | TGGCC                      | ATGGATCAGCGCGTGGCC         |
| SIN2           | 3149                    | TGGCC                      | ATGGATCAGCGCGTGGCC         |
| PUE32          | 3182                    | TGGCC                      | ATGGATCAGCGCGTGGCC         |
| VEN453         | 3181                    | TGGCC                      | ATGGATCAGCGCGTGGCC         |
| GUA131         | 3176                    | TGGCC                      | ATGGATCAGCGCGTGGCC         |
| CHI160         | 3178                    | TGGCC                      | ATGGATCAGCGCGTGGCC         |
| MA0450         | 3178                    | TGGCC                      | ATGGATCAGCGCGTGGCC         |
| YUC7           | 3177                    | TGGCC                      | ATGGATCAGCGCGTGGCC         |
| APC13          | 3176                    | TGGCC                      | ATGGATCAGCGCGTGGCC         |
| GAW329         | 3179                    | TGGCC                      | ATGGATCAGCGCGTGGCC         |
| OAX70          | 3183                    | TGGCC                      | ATGGATCAGCGCGTGGCC         |
| GUA14          | 1642                    | TGGCC                      | ATGGATCAGCGCGTGGCC         |
| JSyMAS_401     | 3179                    | TGGCC                      | ATGGATCAGCGCGTGGCC         |
| JSyLOS_161     | 3177                    | TGGCC                      | ATGGATCAGCGCGTGGCC         |
| Wilkes_Site6   | 3179                    | TGGCC                      | ATGGATCAGCGCGTGGCC         |
| JSyLOS_130     | 1251                    | TGGCC                      | ATGGATCAGCGCGTGGCC         |
| USDA_P1566686  | 1251                    | TGGCC                      | ATGGATCAGCGCGTGGCC         |
| CINMYT_8783    | 1238                    | TGGCC                      | ATGGATCAGCGCGTGGCC         |
| JSyG_197       | 1261                    | TGGCC                      | ATGGATCAGCGCGTGGCC         |
| JSyLOS_109     | 1244                    | TGGCC                      | ATGGATCAGCGCGTGGCC         |
| JSyG_378       | 1213                    | TGGCC                      | ATGGATCAGCGCGTGGCC         |
| CINMYT_11355   | 1260                    | TGGCC                      | ATGGATCAGCGCGTGGCC         |
| JSyMAS_264     | 1240                    | TGGCC                      | ATGGATCAGCGCGTGGCC         |
| USDA_P1566686  | 1251                    | TGGCC                      | ATGGATCAGCGCGTGGCC         |
| BeadLe_Kato_S1 | 1603                    | TGGCC                      | ATGGATCAGCGCGTGGCC         |
| JSyG_374       | 1266                    | TGGCC                      | ATGGATCAGCGCGTGGCC         |
| CINMYT_11374   | 1259                    | TGGCC                      | ATGGATCAGCGCGTGGCC         |
| Puga_11066     | 1248                    | TGGCC                      | ATGGATCAGCGCGTGGCC         |
| Puga_11066     | 146                     | TGGCC                      | ATGGATCAGCGCGTGGCC         |
| CHI349         | 3278                    | TGGCC                      | ATGGATCAGCGCGTGGCC         |
| P1213793       | 3279                    | TGGCC                      | ATGGATCAGCGCGTGGCC         |
| OAX68          | 3289                    | TGGCC                      | ATGGATCAGCGCGTGGCC         |
| URG_II         | 3242                    | TGGCC                      | ATGGATCAGCGCGTGGCC         |
| MEX48          | 3284                    | TGGCC                      | ATGGATCAGCGCGTGGCC         |
| SIN2           | 3253                    | TGGCC                      | ATGGATCAGCGCGTGGCC         |
| PUE32          | 3293                    | TGGCC                      | ATGGATCAGCGCGTGGCC         |
| VEN453         | 3285                    | TGGCC                      | ATGGATCAGCGCGTGGCC         |
| GUA131         | 3280                    | TGGCC                      | ATGGATCAGCGCGTGGCC         |
| CHI160         | 3282                    | TGGCC                      | ATGGATCAGCGCGTGGCC         |
| MA0450         | 3282                    | TGGCC                      | ATGGATCAGCGCGTGGCC         |
| YUC7           | 3281                    | TGGCC                      | ATGGATCAGCGCGTGGCC         |
| APC13          | 3280                    | TGGCC                      | ATGGATCAGCGCGTGGCC         |
| GAW329         | 3287                    | TGGCC                      | ATGGATCAGCGCGTGGCC         |
| OAX70          | 3287                    | TGGCC                      | ATGGATCAGCGCGTGGCC         |
| GUA14          | 1742                    | TGGCC                      | ATGGATCAGCGCGTGGCC         |
| JSyMAS_401     | 3283                    | TGGCC                      | ATGGATCAGCGCGTGGCC         |
| JSyLOS_161     | 3281                    | TGGCC                      | ATGGATCAGCGCGTGGCC         |
| Wilkes_Site6   | 3283                    | TGGCC                      | ATGGATCAGCGCGTGGCC         |
| JSyLOS_130     | 1353                    | TGGCC                      | ATGGATCAGCGCGTGGCC         |
| USDA_P1566686  | 1353                    | TGGCC                      | ATGGATCAGCGCGTGGCC         |
| CINMYT_8783    | 1335                    | TGGCC                      | ATGGATCAGCGCGTGGCC         |
| JSyG_197       | 1365                    | TGGCC                      | ATGGATCAGCGCGTGGCC         |
| JSyLOS_109     | 1348                    | TGGCC                      | ATGGATCAGCGCGTGGCC         |
| JSyG_378       | 1323                    | TGGCC                      | ATGGATCAGCGCGTGGCC         |
| CINMYT_11355   | 1364                    | TGGCC                      | ATGGATCAGCGCGTGGCC         |
| JSyMAS_264     | 1340                    | TGGCC                      | ATGGATCAGCGCGTGGCC         |
| USDA_P1566686  | 1354                    | TGGCC                      | ATGGATCAGCGCGTGGCC         |
| BeadLe_Kato_S1 | 1577                    | TGGCC                      | ATGGATCAGCGCGTGGCC         |
| JSyG_374       | 1370                    | TGGCC                      | ATGGATCAGCGCGTGGCC         |
| CINMYT_11374   | 1359                    | TGGCC                      | ATGGATCAGCGCGTGGCC         |
| Puga_11066     | 1352                    | TGGCC                      | ATGGATCAGCGCGTGGCC         |
| Puga_11066     | 146                     | TGGCC                      | ATGGATCAGCGCGTGGCC         |









Iltis et al 125 129  
INIFAP-JSG 378 149  
INIFAP-JSG 374 149  
CIMMYT-11355 149  
TAK-Kato Site 4 149  
BFB-Benz 967 149  
HGW-Wilkes Site 149  
INIFAP-JSG y LO 157  
INIFAP-JSG y MA 149  
GWB-BeadleKato 149  
INIFAP-JSG y LO 149  
NCRPIS-PI213793 150  
CIMMYT-CHH160 150  
NCRP-MAG450 150  
INIFAP-YUC7 150  
PCIM-APC13 150  
NRC-SAN329 150  
INIFAP-GUA14 150  
CIMMYT-OAX70 150  
INIFAP-OAX68 150  
CIMMYT-URGI1 150  
INIFAP-MX48 433  
INIFAP-PUE32 433  
NCRP-CHI349 150  
CIMMYT-GUA131 150  
ICA-VEN453 150  
B73 149

TCTGGTGGTGGTGC GGCGGTGACGCCGTGCCGCTGCTGGTCTCAACCGGTGG-CTGGTGCTCATCACGTGG-CTGGGACTAGCTGC GGCGGGCGGCTCGCCACCGTGCAC  
TCTGGTGGTGGTGC GGCGGTGACGCCGTGCCGCTGCTGGTCTCAACCGGTGGGCTGGTCTCATCACGTGGGCTGGGACTAGCTGC GGCGGGCGGCTCGCCACCGTGCAC

Iltis et al 125 129  
INIFAP-JSG 378 149  
INIFAP-JSG 374 149  
CIMMYT-11355 149  
TAK-Kato Site 4 149  
BFB-Benz 967 149  
HGW-Wilkes Site 149  
INIFAP-JSG y LO 157  
INIFAP-JSG y MA 149  
GWB-BeadleKato 149  
INIFAP-JSG y LO 149  
NCRPIS-PI213793 150  
CIMMYT-CHH160 150  
NCRP-MAG450 150  
INIFAP-YUC7 150  
PCIM-APC13 150  
NRC-SAN329 150  
INIFAP-GUA14 150  
CIMMYT-OAX70 150  
INIFAP-OAX68 150  
CIMMYT-URGI1 150  
INIFAP-MX48 541  
INIFAP-PUE32 541  
INIFAP-SIN2 150  
NCRP-CHI349 150  
CIMMYT-GUA131 150  
ICA-VEN453 150  
B73 149

CGCGACTATGGCGTCC-TCAACCGCGTGTTCACACACATCAGCGACACGGCAGCTACGCCACCCCTCTTCACCTGTGAGGCTATGACTTATACGGGATTTGGGCTTGGCG  
CGCGACTATGGCGTCCCTCAACCGCGTGTTCACCAACATCAGCGACACGTAAGCTACGCCACCCCTCTTCACCTGTGAGGCTATGACTTATACGGGATTTGGGCTTGGCG

Iltis et al 125 129  
INIFAP-JSG 378 149  
INIFAP-JSG 374 149  
CIMMYT-11355 149  
TAK-Kato Site 4 149  
BFB-Benz 967 149  
HGW-Wilkes Site 149  
INIFAP-JSG y LO 157  
INIFAP-JSG y MA 149  
GWB-BeadleKato 149  
INIFAP-JSG y LO 149  
NCRPIS-PI213793 150  
CIMMYT-CHH160 150  
NCRP-MAG450 150  
INIFAP-YUC7 150  
PCIM-APC13 150  
NRC-SAN329 150  
INIFAP-GUA14 150  
CIMMYT-OAX70 150  
INIFAP-OAX68 150  
CIMMYT-URGI1 150  
INIFAP-MX48 650  
INIFAP-PUE32 653  
INIFAP-SIN2 150  
NCRP-CHI349 150  
CIMMYT-GUA131 150  
ICA-VEN453 150  
B73 149

CAGTAGTITGGGCGTCCGCGTGATAGCGAGCGTTAGCGTAAGCAGTCCAGGTGAATTTGTTGAAACGGACCGGTTTAAAGCCCGGCTGATAACGGGCGGTGCTCGGGCT  
CAGTAGTITGGGCGTCCGCGTGATAGCGAGCGTTAGCGTAAGCAGTCCAGGTGAATTTGTTGAAACGGACCGGTTTAAAGCCCGGCTGATAACGGGCGGTGCTCGGGCT

Iltis et al 125 129  
INIFAP-JSG 378 149  
INIFAP-JSG 374 149  
CIMMYT-11355 149  
TAK-Kato Site 4 149  
BFB-Benz 967 149  
HGW-Wilkes Site 149  
INIFAP-JSG y LO 157  
INIFAP-JSG y MA 149  
GWB-BeadleKato 149  
INIFAP-JSG y LO 149  
NCRPIS-PI213793 150  
CIMMYT-CHH160 150  
NCRP-MAG450 150  
INIFAP-YUC7 150  
PCIM-APC13 150  
NRC-SAN329 150  
INIFAP-GUA14 150  
CIMMYT-OAX70 150  
INIFAP-OAX68 150  
CIMMYT-URGI1 150  
INIFAP-MX48 760  
INIFAP-PUE32 763  
INIFAP-SIN2 150  
NCRP-CHI349 150  
CIMMYT-GUA131 150  
ICA-VEN453 150  
B73 149

AGCCCAACGGGCTCAAATCTCTGTCGAGCCCGGCACGCTATCCGGGCCGGGCTAAGCCCGGCCCGCTTCATTCCGTGCCGGGCCGGGCTCGTGTCTGCTAAAAATCG  
AGCCCAACGGGCTCAAATCTCTGTCGAGCCCGGCACGCTATCCGGGCCGGGCTAAGCCCGGCCCGCTTCATTCCGTGCCGGGCCGGGCTCGTGTCTGCTAAAAATCG
