# Supplementary material for: The regulatory landscape of a core maize domestication module controlling bud dormancy and growth repression
Source: PubMed Central journal article supplement (PMC6707278; doi:10.1038/s41467-019-11774-w), 2019-08-23
Supplement: 41467_2019_11774_MOESM21_ESM.pdf [file 41467_2019_11774_MOESM21_ESM.pdf]

Corresponding author(s): \_\_\_\_\_

Last updated by author(s): \_\_\_\_\_

x  
x  
x  
x  
x  
x  
x  
x  
x  
x  
x

Illumina Hi-seq 2500 sequencer and Illumina Hi-seq 4000 platform

FastQC, Trimmomatic v.0.36, STAR aligner v.2.6.0a, R package edgeR v.3.22.5, AgriGO v2.0, ggplot2, Bowtie2, MACS2, MEME

*Provide your data availability statement here.*

x
